1            **3D Printed Snorkel Mask Adapter for Failed N95 Fit Tests and PPE Shortages**

2        Shiv Dalla MS<sup>1</sup>, Rohit Shinde MS<sup>2</sup>, Jack Ayres BS<sup>1</sup>, Stephen Waller MD<sup>1</sup>, Jay Nachtigal MD<sup>1</sup>

3

4        <sup>1</sup>University of Kansas Medical Center

5        <sup>2</sup>Unaffiliated

6

7

8

9

10

11        Corresponding author information:

12        Shiv Dalla MS

13        2200 W 47<sup>th</sup> Pl, Apt 304

14        Westwood, KS 66205

15        Phone: (316) 250-9933

16        [sdalla@kumc.edu](mailto:sdalla@kumc.edu)

17

18 **ABSTRACT**

19 Introduction

20 The shortage of personal protective equipment (PPE) across the country has been widely  
21 discussed throughout the COVID-19 pandemic. Unfortunately, recent reports indicate that PPE  
22 shortages persist amidst continually increasing caseloads nationwide. Additionally, there have  
23 been reports of poor-fitting masks, a problem which is magnified by shortages. The lack of  
24 adequate access to conventional N95 masks pushed for some to pursue 3D printing and locally  
25 distributing their own manufactured masks as substitutes when PPE, including N95 masks, were  
26 not readily available. The design presented, the snorkel mask adapter, is one such design born  
27 from the local maker community in partnership with local physicians and hospitals. This article  
28 discusses the design, manufacturing, and validation of the snorkel mask adapter and its  
29 immediate use in the COVID-19 pandemic as well as future use as stopgap PPE.

30

31 Methods

32 The design presented is an adapter which can be used with a commercially available snorkel  
33 mask in order to serve as a full face respirator in either the case of a PPE shortage or more  
34 pertinently for those who are unable to pass fit testing with the available N95 respirators at their  
35 respective facilities. Mask components were 3D printed, assembled, and then fit tested by  
36 qualitative fit testing (QLFT) at The University of Kansas Health System (TUKHS) in Kansas  
37 City, KS as a proof of concept.

38

39

40 Results

41 At TUKHS, the mask was fit tested on 22 individuals who required an N95 mask but were not  
42 able to pass qualitative fit testing with the masks available to them at the time. Of the 22 tested,  
43 all 22 of them were able to pass QLFT with the snorkel mask, adapter, and viral/bacterial filter  
44 combination.

45

46 Conclusion

47 The results of the fit testing at TUKHS is promising for this N95 alternative. More extensive  
48 testing can and should be done, including quantitative fit testing. Persistently increasing  
49 caseloads and PPE shortages necessitates an urgent dissemination of these preliminary results.

50 The authors do not advocate for this design as a replacement of traditional N95 masks or other  
51 PPE but do endorse this design as a stopgap measure, proven to be effective in situations of dire  
52 PPE shortage or for individuals who have failed fit testing with conventional PPE.

53

54

## 55 INTRODUCTION

### 56 Background

57 In December of 2019 the first cases of a novel coronavirus, named SARS-CoV-2, were  
58 reported in China.<sup>1</sup> As the virus spread across the continent, it proved to be both highly  
59 contagious and highly virulent.<sup>1</sup> Some infected patients were suffering from acute respiratory  
60 distress syndrome (ARDS).<sup>1</sup> By the middle of March 2020, the World Health Organization had  
61 designated the COVID-19 outbreak as a pandemic. Reports of not only strained economies but  
62 also strained global healthcare systems flooded the news.<sup>2</sup> Within healthcare settings, the focus  
63 shifted to the adequacy of personal protective equipment (PPE).<sup>3</sup>

### 64 65 PPE Shortages

66 The shortage of PPE across the country has been widely discussed by government  
67 officials and healthcare practitioners as well as the general population.<sup>3-5</sup> Unfortunately, recent  
68 reports indicate the supply of PPE “is running low again as the virus resumes its rapid spread  
69 and the number of hospitalized patients climbs.”<sup>6</sup> Although the situation has improved since it  
70 was first evaluated earlier in the year, many experts predict that shortages persist.<sup>7</sup> Additionally,  
71 some predict that it may take years in order for stockpiles to fully replenish, an increasingly  
72 urgent challenge as cases continue to rise across the United States.<sup>7</sup> Shortages of PPE have  
73 repeatedly been shown to contribute to the spread of the virus, and “the situation is especially  
74 dire at hospitals serving communities of color or patients on Medicaid.”<sup>8</sup>

75

76

77 Fit Testing

78 In addition to PPE shortages, various studies have commented on difficulties regarding  
79 inadequate mask fitting.<sup>9,10</sup> Mask fit is an important consideration of mask efficacy and is  
80 typically measured by either qualitative fit-tests (QLFT) or quantitative fit-tests (QNFT).<sup>9</sup> In  
81 qualitative fit-tests, mask wearers are tested to see if they can detect bitter or sweet scents  
82 aerosolized around the masked wearer, whereas quantitative fit-tests measure ratios of ambient  
83 aerosols inside and outside of the mask.<sup>9</sup> A 2018 Korean study reported QNFT pass rates of the  
84 four most common N95 models to be below 50%, with poorer fit test results observed for women  
85 compared to men.<sup>10</sup> The inherent challenge of the possibility of a poor mask fit is magnified  
86 during pandemic settings due to time pressures and limited availability of options.

87

88 3D Printed Alternatives

89 As the aforementioned issues with PPE were playing out, communities of 3D printing  
90 aficionados, colloquially known as “makers,” began to discuss the issue and created homemade  
91 masks, face shields, and gowns. Specifically, those with access to 3D printers were encouraged  
92 to continually run their machines to produce face-shields and masks that could be used in the  
93 health care sector. The lack of adequate access to conventional N95 masks pushed for some to  
94 pursue 3D print and locally distribute masks to assist in reducing PPE shortages. The widespread  
95 availability of 3D printers and cost-effective nature of the manufacturing process makes it  
96 excellent for such purposes.

97 The design presented is an adapter which can be used with a commercially available  
98 snorkel mask in order to serve as a full face respirator in either the case of a PPE shortage, or  
99 more pertinently for those who are unable to pass fit testing with the available N95 respirators at

100 their respective facilities. This article focuses on the design, manufacture, and validation of the  
101 snorkel mask adapter design and its usage in the COVID-19 pandemic as well as future usage as  
102 stopgap PPE.

103

## 104 **METHODS**

### 105 Adapter Design

106 The adapter was designed to connect an OceanReef snorkel mask to a Hudson RCI In-  
107 Line Bacterial/Viral Filter<sup>11</sup> commonly found in both operating rooms and intensive care units  
108 for filtration and humidification of air in mechanically ventilated patients. These filters were  
109 chosen for their cost-effective nature, high availability during PPE shortages, and low resistance  
110 to gas flow while maintaining 99.99% filtration efficiency.<sup>11</sup> The assembled design is shown in  
111 Figure 1 and the 3D printed adapter is shown in Figure 2.

112 **Figure 1: OceanReef snorkel mask coupled to a Hudson bacterial/viral filter with the 3D**  
113 **printed adapter (red)**

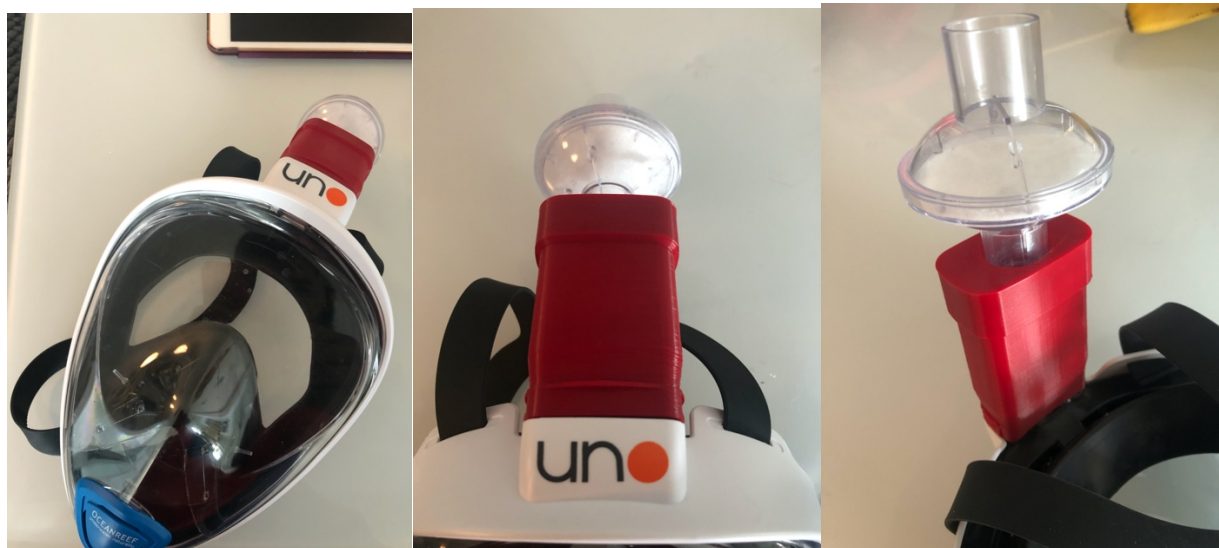

114

115 **Figure 2: Engineering Drawing of Snorkel Mask Adapter Design**

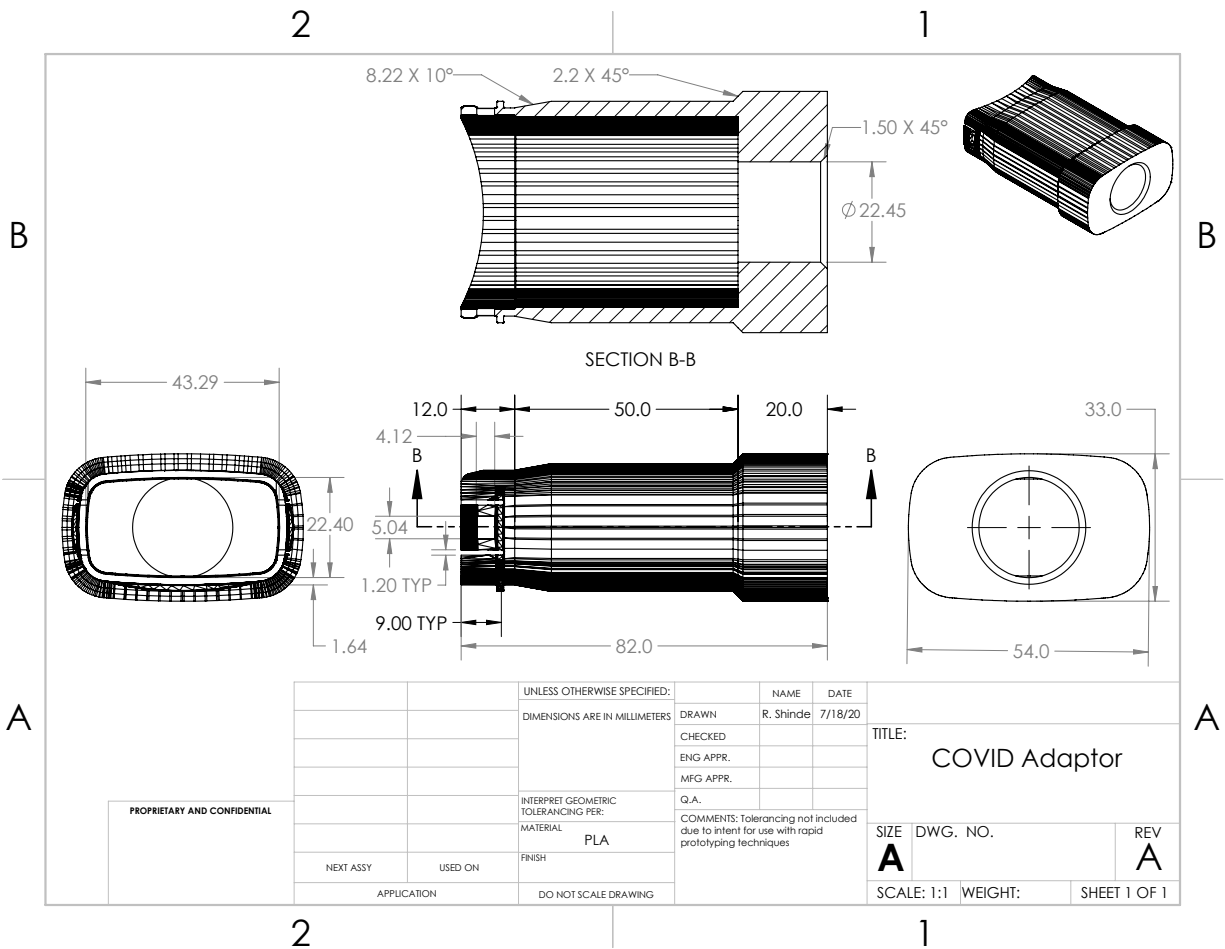

116

117

118 **Design and 3D Printing**

119 This design was generated using commercial CAD software and exported to an Standard

120 Tessellation Language (STL) file for compatibility with hobbyist 3D printer workflows. These

121 workflows use a “slicer” software to convert the universal STL file into GCODE that is specific

122 to an individual 3D printer. Two combinations of slicer and 3D printer were tested: the Cura

123 slicer was used to prepare GCODE for a Lulzbot Taz5, and PrusaSlicer was used to prepare

124 GCODE for a Creality CR-10S. Adapters were printed in a variety of filaments including

125 Polylactic acid (PLA), Polyethylene terephthalate glycol (PET-G), and Thermoplastic

126 polyurethane (TPU). Polylactic acid (PLA) was chosen given its melting point, ease of use, and  
127 cost effectiveness. Print settings shown in Table 1 were used. However, these may vary based on  
128 software and printer. For most printers, the default PLA settings will be sufficient.

129 **Table 1: Print settings used on the Taz5 Printer with eSun PLA+ Filament**

| Select Print Setting               | Value      |
|------------------------------------|------------|
| Layer Height                       | 0.25mm     |
| Wall Line Count                    | 4          |
| Top/Bottom Layers                  | 4          |
| Infill Density                     | 20% to 50% |
| Printing Temperature (Nozzle)      | 205°C      |
| Printing Temperature (Build Plate) | 60°C       |

130

131 Usage and Fit Testing

132 Before being taken in for formal qualitative fit testing (QLFT) at The University of  
133 Kansas Health System (TUKHS), a water seal test was performed. The wearer donned the mask,  
134 adapter, and viral filter combination and was submerged into water such that the water level was  
135 above the connection of the filter to the adapter, but below the top of the filter. This was done to  
136 allow for identification of leaks in the system. If the wearer felt water entering the mask or if air  
137 was seen escaping in the adapter fitment the model was identified as not air or water tight. This  
138 test was only performed before a version of the adapter was sent for QLFT at TUKHS.

139 At TUKHS, the design was fit tested by the facilities staff using a standard saccharin  
140 solution aerosol protocol. At TUKHS, participants were those who were not able to pass fit



141 testing with the standard N95 respirators available at TUKHS. None of the designers of the  
142 adapter or authors of this paper were present for fit testing, to ensure an unbiased fit test.

143

#### 144 Study Design

145 IRB approval was not requested nor required for this study because this was essentially a  
146 proof of concept and quality improvement initiative. The design went through the proper  
147 channels at TUKHS for testing and approval of PPE during the height of the pandemic. Although  
148 further analysis and study to prove efficacy is required, the purpose of this study and article is to  
149 discuss the design, manufacturing, and validation of the snorkel mask adapter concept.

150

#### 151 **RESULTS**

152 At TUKHS, 3832 people have been fit tested at least once for standard half face  
153 respirators. Of these, 211 people are currently listed as powered air purifying respirator (PAPR)  
154 only, placing a significant load on access to PAPR devices. The snorkel mask, adapter, and viral  
155 filter combination was fit tested on 22 individuals of the 3832 people who required an N95 mask  
156 but were not able to pass qualitative fit testing with the masks available to them at the time.  
157 Three sizes of Ocean Reef Uno snorkel masks were used: S/M, M/L, L/XL. Of the 22 individuals  
158 tested, all 22 of them were able to pass QLFT with the snorkel mask (one of 3 sizes), adapter,  
159 and Hudson RCI viral/bacterial filter combination. It was deemed appropriate that five of these  
160 22 individuals were given snorkel masks, adapters, and filters to use as necessary.

161

162

163 **DISCUSSION**

164 The results of the fit testing at TUKHS is promising for this N95 alternative. More  
165 extensive testing can and should be done, including quantitative fit testing. However, the initial  
166 results suggest that this mask could be efficacious at a larger scale. Of those who passed  
167 qualitative fit testing (QLFT) (N = 463) with all N95 FFR models, 86.9% (N = 459) also passed  
168 quantitative fit testing. This suggest that qualitative fit testing, although less rigorous than  
169 quantitative fit testing, does correlate highly with proper mask fitment.<sup>9</sup>

170 Persistently increasing caseloads and PPE shortages necessitates an urgent dissemination  
171 of these preliminary results. The authors do not advocate for this design as a replacement of  
172 traditional N95 masks or other PPE but do endorse this design as a stopgap measure, proven to  
173 be effective in situations of dire PPE shortage or for individuals who have failed fit testing with  
174 conventional PPE.

175

176 **CONCLUSION**

177 The results of the fit testing at TUKHS is promising for this N95 alternative. More extensive  
178 testing can and should be done, including quantitative fit testing. Persistently increasing  
179 caseloads and PPE shortages necessitates an urgent dissemination of these preliminary results.  
180 The authors do not advocate for this design as a replacement of traditional N95 masks or other  
181 PPE but do endorse this design as a stopgap measure, proven to be effective in situations of dire  
182 PPE shortage or for individuals who have failed fit testing with conventional PPE.

183

184

185   **REFERENCES**

- 186   1.     Sohrabi C, Alsafi Z, O'Neill N, et al. World Health Organization declares global  
187         emergency: A review of the 2019 novel coronavirus (COVID-19). *Int J Surg.*  
188         2020;76:71-76.
- 189   2.     Mike-Hana Fongang M, Ahmadi N. *The Impact of a Pandemic (COVID-19) on the Stock*  
190         *Markets : A Study on the Stock Markets of China, US and UK* [Student thesis]2020.
- 191   3.     Jacobs A, Richtel M, Baker M. ‘At War With No Ammo’: Doctors Say Shortage of  
192         Protective Gear Is Dire. *The New York Times.* 2020/03/19/T15:58:44-04:00, 2020;Health.
- 193   4.     Jessop ZM, Dobbs TD, Ali SR, et al. Personal Protective Equipment (PPE) for Surgeons  
194         during COVID-19 Pandemic: A Systematic Review of Availability, Usage, and  
195         Rationing. *Br J Surg.* 2020.
- 196   5.     Mandrola J. [CoViD-19 and PPE: some of us will die because of the shortage.]. *Recenti*  
197         *Prog Med.* 2020;111(4):183.
- 198   6.     Fassett GM, Camille. Supply of PPE for medical workers begins to run low again as  
199         COVID-19 spikes in US. *chicagotribunecom.* 2020.
- 200   7.     Pulver D, Wedell K, Mansfield E. Despite warnings, the US wasn't prepared with masks  
201         for coronavirus. Now it's too late. *USA TODAY.* 2020.
- 202   8.     Dunn L, Fitzpatrick S. Few N95 masks, reused gowns: Dire PPE shortages reveal  
203         COVID-19's racial divide. *NBC News.* 2020.
- 204   9.     Hon CY, Danyluk Q, Bryce E, et al. Comparison of qualitative and quantitative fit-testing  
205         results for three commonly used respirators in the healthcare sector. *J Occup Environ*  
206         *Hyg.* 2017;14(3):175-179.

- 207 10. Huh YJ, Jeong HM, Lim J, et al. Fit Characteristics of N95 Filtering Facepiece  
208 Respirators and the Accuracy of the User Seal Check among Koreans. *Infect Control*  
209 *Hosp Epidemiol.* 2018;39(1):104-107.
- 210 11. Teleflex. Hudson RCI In-Line Bacterial Viral Filter For CPAP/BIPAP Machines.  
211 [https://www.healthproductsforyou.com/p-hudson-rci-in-line-bacterial-viral-filter-for-](https://www.healthproductsforyou.com/p-hudson-rci-in-line-bacterial-viral-filter-for-cpapbipap-machines.html)  
212 [cpapbipap-machines.html](https://www.healthproductsforyou.com/p-hudson-rci-in-line-bacterial-viral-filter-for-cpapbipap-machines.html). Published 2020. Accessed 7-23, 2020.
- 213

2

1

B

B

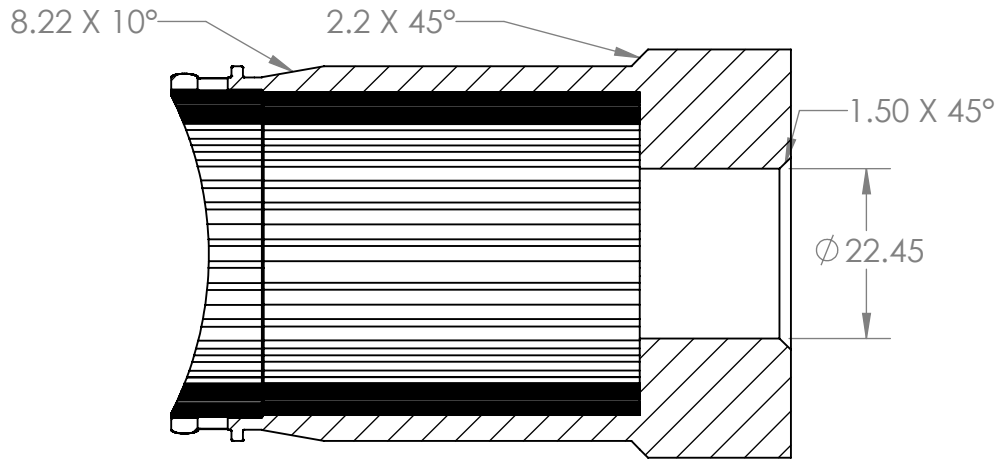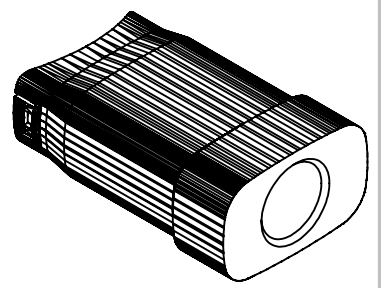

SECTION B-B

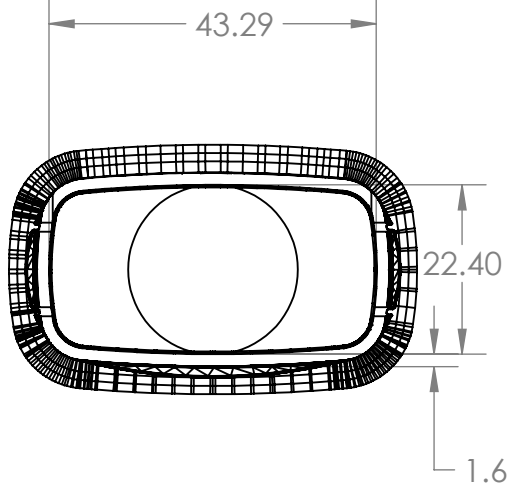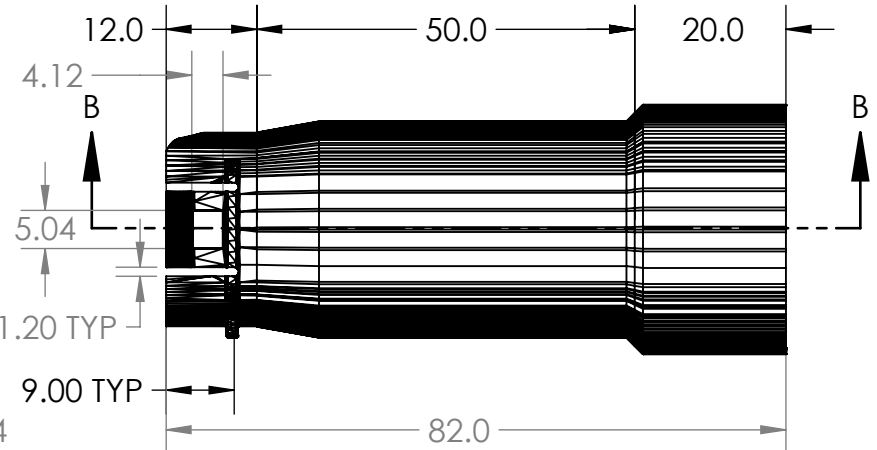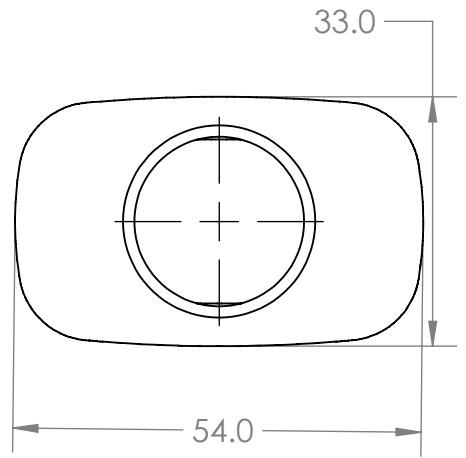

A

A

PROPRIETARY AND CONFIDENTIAL

|             |         |                                      |                                                                                            |           |
|-------------|---------|--------------------------------------|--------------------------------------------------------------------------------------------|-----------|
|             |         | UNLESS OTHERWISE SPECIFIED:          | NAME                                                                                       | DATE      |
|             |         | DIMENSIONS ARE IN MILLIMETERS        | DRAWN                                                                                      | R. Shinde |
|             |         |                                      | CHECKED                                                                                    |           |
|             |         |                                      | ENG APPR.                                                                                  |           |
|             |         |                                      | MFG APPR.                                                                                  |           |
|             |         | INTERPRET GEOMETRIC TOLERANCING PER: | Q.A.                                                                                       |           |
|             |         | MATERIAL                             | COMMENTS: Tolerancing not included due to intent for use with rapid prototyping techniques |           |
|             |         | FINISH                               |                                                                                            |           |
| NEXT ASSY   | USED ON |                                      |                                                                                            |           |
| APPLICATION |         | DO NOT SCALE DRAWING                 |                                                                                            |           |

TITLE: COVID Adaptor

|            |          |              |
|------------|----------|--------------|
| SIZE       | DWG. NO. | REV          |
| <b>A</b>   |          | <b>A</b>     |
| SCALE: 1:1 | WEIGHT:  | SHEET 1 OF 1 |

2

1
